# Supplementary material
Source: Springer Nature journal article supplement (https://www.springermedizin.de/resource/supplementary/12936_2004_116_MOESM3_ESM.pdf/9546904)

Marker

1

2

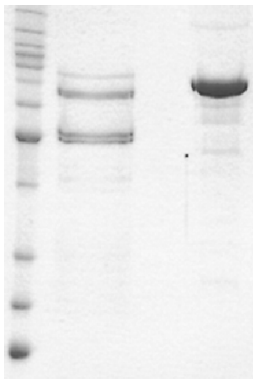

72 KDa

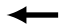

GST-DBL1 $\alpha$   
(FCR3S1.2)

Supplement: MOESM3 [file 9546904]
